# Supplementary material for: Culture-Independent Microbiological Analysis of Foley Urinary Catheter Biofilms
Source: PLoS One. 2009 Nov 12;4(11):e7811. doi: 10.1371/journal.pone.0007811 (PMC2771765; doi:10.1371/journal.pone.0007811)
Supplement: Table S1 — Phylogenetic distribution of Foley catheter bacteria across sample sites. (0.10 MB PDF) [file pone.0007811.s001.pdf]

**Table S1. Phylogenetic Distribution of Foley Catheter Bacteria across Sample Sites.**

[illegible]
